# Supplementary material
Source: publisher figshare collection journal article supplement (https://tandf.figshare.com/ndownloader/files/21966726)
Supplement: Supplementary file 1 [file 21966726]

***Supplementary Material***

**Supplemental figure S1**

**Figure 1** Antibiotic resistance of EPEC strains isolates from bovine mastitis in five-major dairy product regions of China.

**Supplemental table S1** PCR primers and conditions for multilocus sequence analysis

| Target gene | Primer sequence | PCR conditions | | PCR-product length（bp） | | Reference |
| --- | --- | --- | --- | --- | --- | --- |
| **Molecular idetification**  *16S* | GTTAATACCTTTGCTCATTGA  ACCAGGGTATCTAATCCTGTT | 94°C 1min，94°C 60s，55°C 30 s，72°C 90s，72°C 3.5min（37cycles） | | 340 | | (Malinen et al., 2003) |
| *rpoB*1698f  *rpoB*2041r | AACATCGGTTTGATCAAC  CGTTGCATGTTGGTACCCAT | 94°C 5min，94°C 30 s，50°C 90 s，72°C 90 s，72°C 10min（25cycles） | 343 | | (Dahllöf et al., 2000) | |
| **Resistance genes**  *tet*A | GTGAAACCCAACATACCCC  GAAGGCAAGCAGGATGTAG | 95°C 5min，94°C 30 s，63°C 90 s，72°C 90s，72°C 7min（30cycles） | 888 | | (Harel et al., 1991) | |
| *tet*B | AGTGGAGCGATTACAGAA  CATATGTCCTGGCGTGTCTA | 95°C 5min，94°C 30 s，63°C 90 s，72°C 90s，72°C 7min（30cycles） | 158 | | (Harel et al., 1991) | |
| *bla*TEM | TTGCTCACCCAGAAACGCTGGTG  TACGATACGGGAGGGCTTACC | 95°C 5min，94°C 30 s，63°C 90 s，72°C 90s，72°C 7min（30cycles） | 708 | | (Ribeiro et al., 2016) | |
| *bla*CTX-M | ATGTGCAGYACCAGTAARGTKATGGM  TGGGTRAARTARGTSACCAGAAYCAGCGG | 95°C 5min，94°C 30 s，63°C 90 s，72°C 90s，72°C 7min（30cycles） | 593 | | (Ribeiro et al., 2016) | |
| *flo*R | ATGACCACCACACGCCCC  GCCGAAGGAGCACCAGCC | 95°C 3min，94°C 60 s，50°C 90 s，72°C 60s，72°C 10min（35cycles） | 1177 | | (Yaqoob et al., 2018) | |
| *gyr*A | AAATCTGCCCGTGTCGTTGGT  GCCATACCTACGGCGATACC | 94°C 4min，94°C 30s，55°C 45 s，72°C 60 s，72°C 10min（30cycles） | 344 | | (Rodriguez-Martinez et al., 2006) | |
| *aac*3 | GGCTCAAGTATGGGCATCAT  TCACCGTAATCTGCTTGCAC | 94°C 5min，94°C 30s，55°C 30s，72°C 60 s，72°C 10min（30cycles） | 389 | | (Ojdana et al., 2018) | |
| *bla*OXA48 | GCGTGGTTAAGGATGAACAC  CATCAAGTTCAACCCAACCG | 94°C 3min，94°C 30s，56°C 35s，72°C 45s，72°C 5min（35cycles） | 400 | | (Doi and Paterson) | |
| *NDM* | GGTTTGGCGATCTGGTTTTC  CGGAATGGCTCATCACGATC | 94°C 3min，94°C 30s，56°C 35s，72°C 45s，72°C 5min（35cycles） | 600 | | (Doi and Paterson) | |
| *aac*6 | ATGSCCTTGCGATGCTCTATGA  CGAATGCCTGGCGTGTTT | 94°C 10min，94°C 50s，54°C 45s，72°C 50s，72°C 10min（32cycles） | 486 | | (Fernandez-Martinez et al., 2015) | |
| *bla*KPC | CGTCTAGTTCTGCTGTCTTG  CTTGTCATCCTTGTTAGGCG | 94°C 3min，94°C 30s，56°C 35s，72°C 45s，72°C 15min（35cycles） | 700 | | (Doi and Paterson) | |
| *bla*FOX | CTACAGTGCGGGTGGTTT  CTATTTGCGGCCAGGTGA | 94°C 3min，94°C 40s，60°C 40s，72°C 60s，72°C 7min（30cycles） | 162 | | (Perez-Perez and Hanson, 2002) | |

**Supplemental table S2** PCR primers and conditions for amplification of virulence genes

| Target gene | Primer sequence | PCR conditions | PCR product length（bp） | | | Reference |
| --- | --- | --- | --- | --- | --- | --- |
| *bfp*EP | AATGGTGCTTGCGCTTGCTGC  GGCGCTTTATCCAACCTGGTA | 94°C 5min，94°C 30 s，61°C 60 s，72°C 120 s，72°C 10min（25cycles） | | 397 | Gunzburg, S. T. et al.(1995) | |
| *eae* | GAGAATGAAATAGAAGTCGT GCGGTATCTTTCGCGTAATCGCC | 94°C 2min，94°C 60s，55°C 60 s，72°C 60 s，72°C 10min（35cycles） | | 775 | (Rey et al., 2006) | |
| *esp* | AAACAGCAGGCACTTGAACG  GGAGTCGTCAGTCAGTAGAT | 94°C, 30 s; 56°C, 60 s;  72°C, 150 s（40cycles） | | 1,830 | (Brunder et al., 1999) | |
| *agg*R | GTATACACAAAAGAAGGAAGC  ACAGAATCGTCAGCATCAGC | 94°C 4min，94°C 60s，55°C 60 s，72°C 90 s，72°C 7min（30cycles） | | 254 | (Rúgeles et al., 2010) | |
| *elt* | TCTCTATGTGCATACGGAGC  CCATACTGATTGCCGCAAT | 96°C 4min，94°C 30s，58°C 30 s，72°C 60 s，72°C 7min（35cycles） | | 322 | (Tamanai-Shacoori et al., 1994) | |
| *ipa*H | GGTTCCTTGACCGCCTTTCCGATACCG  TC  GCCGGTCAGCCACCCTCTGAGAGTAC | 94°C 2min，92°C 30s，60°C 30 s，72°C 30 s，72°C 5min（40cycles） | | 619 | (Sethabutr et al., 1993) | |
| *stx*1 | TTAGACTTCTCGACTGCAAAG  TGTTGTACGAAATCCCCTCTG | 94°C 2min，94°C 60s，55°C 60 s，72°C 60 s，72°C 10min（35cycles） | | 302 | (Rey et al., 2006) | |
| *stx*2 | TTATATCTGCGCCGGGTCTG  AGACGAAGATGGTCAAAACG | 94°C 4min，94°C 60s，55°C 60 s，72°C 90 s，72°C 7min（30cycles） | | 326 | (Woodward et al., 1992) | |

**Supplemental table S3** Sequences of oligonucleotide primers used for typing of eae intimin gene

| Gene | Oligonucleotide sequence (5'-3') | PCR product length（bp） | Annealing temperature | Reference |
| --- | --- | --- | --- | --- |
| eae-α1 | AAAACCGCGGAGATGACTTC | 820 | 60 | (Blanco et al., 2004c) |
|  | CACTCTTCGCATCTTGAGCT |  |  |  |
| eae-α2 | AGACCTTAGGTACATTAAGTAAGC | 517 | 60 | (Blanco et al., 2004c) |
|  | TCCTGAGAAGAGGGTAATC |  |  |  |
| eae-β1 | ACTTCGCCACTTAATGCCAGC | 730 | 66 | (Blanco et al., 2004d) |
|  | TTGCAGCACCCCATGTTGAAT |  |  |  |
| eae-ξR/β2 | AAGGGGGGAACCCCTGTGTCA | 604 | 66 | (Blanco et al., 2004d) |
|  | ATTTATTCGCAGCCCCCCACG |  |  |  |
| eae-δ/κ/β2O | AAAACCGCGGAGATGACTTC | 833 | 60 | (Blanco et al., 2004c) |
|  | CTTGATACACCCGATGGTAAC |  |  |  |
| eae-γ1 | AAAACCGCGGAGATGACTTC | 804 | 60 | (Blanco et al., 2004c) |
|  | AGAACGCTGCTCACTAGATGTC |  |  |  |
| eae-θ/γ2 | AAAACCGCGGAGATGACTTC | 808 | 58 | (Blanco et al., 2004c) |
|  | CTGATATTTTATCAGCTTCA |  |  |  |
| eae-ε1 | AAAACCGCGGAGATGACTTC | 722 | 66 | (Blanco et al., 2004c) |
|  | AGCTCACTCGTAGATGACGGCAAGCG |  |  |  |
| eae-νR/ε2 | AATACAGAAGTTAAGGCAT | 378 | 58 | (Blanco et al., 2004d) |
|  | ACGACCACTATTCATTTC |  |  |  |
| eae-ζ | GGTAAGCCGTTATCTGCC | 206 | 62 | (Blanco et al., 2004c) |
|  | ATAGCAAGTGGGGTGAAG |  |  |  |
| eae-η | AAAACCGCGGAGATGACTTC | 702 | 60 | (Blanco et al., 2004d) |
|  | TAAGCGACCACTATTCGTG |  |  |  |
| eae-ι1 | AAAACCGCGGAGATGACTTC | 651 | 55 | (Blanco et al., 2004d) |
|  | GTCATATTTAACTTTTACACTA |  |  |  |
| eae-μR/ι2 | CTGGTAAAGCGATAGTCAAAC | 936 | 58 | (Blanco et al., 2004d) |
|  | GCGTTTTTGAAGAAACATTTTGC |  |  |  |
| eae-λ | CGGTCAGCCTGTGAAGGGC | 466 | 643 | (Blanco et al., 2004c) |
|  | ATAGATGCCTCTTCCGGTATT |  |  |  |
| eae-μB | AAAACCGCGGAGATGACTTC | 665 | 60 | (Blanco et al., 2004d) |
|  | ACTCATCATAATAAGCTTTTTGG |  |  |  |
| eae-νB | CACAGCTTACAATTGATAACA | 311 | 60 | (Blanco et al., 2004c) |
|  | CTCACTATAAGTCATACGACT |  |  |  |
| eae-ξB | AAAACCGCGGAGATGACTTC | 468 | 66 | (Blanco et al., 2004c) |
|  | ACCACCTTTAGCAGTCAATTTG |  |  |  |

**Supplemental table S4** Primer sequences and sizes of PCR products used in the phylotyping method.

| Target | Primer sequences | PCR product (bp) | Reference |
| --- | --- | --- | --- |
| *chuA* | ATGGTACCGGACGAACCAAC | 288 | (Clermont et al., 2000) |
|  | TGCCGCCAGTACCAAAGACA |  |  |
| yjaA | CAAACGTGAAGTGTCAGGAG | 211 | (Clermont et al., 2000) |
|  | AATGCGTTCCTCAACCTGTG |  |  |
| TspE4.C2 | CACTATTCGTAAGGTCATCC | 152 | (Clermont et al., 2000) |
|  | AGTTTATCGCTGCGGGTCGC |  |  |
| arpA | AACGCTATTCGCCAGCTTGC | 400 | (Clermont et al., 2000) |
|  | TCTCCCCATACCGTACGCTA |  |  |
| arpA-1 | GATTCCATCTTGTCAAAATATGCC | 301 | (Lescat et al., 2013) |
|  | GAAAAGAAAAAGAATTCCCAAGAG |  |  |
| trpA | AGTTTTATGCCCAGTGCGAG | 219 | (Lescat et al., 2013) |
|  | TCTGCGCCGGTCACGCCC |  |  |
| trpA-1 | CGGCGATAAAGACATCTTCAC | 489 | (Clermont et al., 2008) |
|  | GCAACGCGGCCTGGCGGAAG |  |  |

PCR reactions were performed under the following conditions: denaturation 4 min at 94°C, 30 cycles of 5 s at 94°C and 20 s at 57°C (group E) or 59°C (quadruplex and group C), and a final extension step of 5 min at 72°C. The primers used for the allele-specific phylo-groups E and C PCRs were arpA-1 and trpA respectively (Lescat et al., 2012). In E- and C-specific PCR reactions, the primers trpA-1 are added to provide an internal control.

**Supplemental table S5** Oligonucleotide primers for PCR assays for *E. coli* O serotyping by multiplex PCR

| Target gene | Primer sequence | PCR product length（bp） | Reference |
| --- | --- | --- | --- |
| O121 | TCCAACAATTGGTCGTGAAA | 628 | (DebRoy et al., 2011) |
|  | AGAAAGTGTGAAATGCCCGT |  |  |
| O111 | TGTTTCTTCGATGTTGCGAG | 438 | (DebRoy et al., 2011) |
|  | GCAAGGGACATAAGAAGCCA |  |  |
| O128 | GCTTTCTGCCGATATTTGGC | 289 | (Ranjbar et al., 2017) |
|  | CCGACGGACTGATGCCGGTGATT |  |  |
| O91 | CGCATTTAAGGACTGGCTGT | 277 | (Taghadosi et al., 2018) |
|  | GTAGCAGATATGCCGACCGT |  |  |
| O22 | TGTCGCCACTACTTTCCGCGTTTA | 458 | (Lee et al., 2019) |
|  | AGCCCATGACATTACTACGGCACT |  |  |
| O26 | CAATGGGCGGAAATTTTAGA | 155 | (DebRoy et al., 2011) |
|  | ATAATTTTCTCTGCCGTCGC |  |  |
| O113 | TTGCTATAAATGGAAGCCATTCTTT | 107 | (Perelle et al., 2004) |
|  | TGCATGAAATGTTTAAATGCAGCGGGT |  |  |
